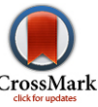

# Trace Metal Inventories and Lead Isotopic Composition Chronicle a Forest Fire's Remobilization of Industrial Contaminants Deposited in the Angeles National Forest

Kingsley O. Odigie\*, A. Russell Flegal

WIGS Laboratory, Environmental Toxicology, University of California Santa Cruz, Santa Cruz, California, United States of America

## Abstract

The amounts of labile trace metals: [Co] (3 to 11  $\mu\text{g g}^{-1}$ ), [Cu] (15 to 69  $\mu\text{g g}^{-1}$ ), [Ni] (6 to 15  $\mu\text{g g}^{-1}$ ), [Pb] (7 to 42  $\mu\text{g g}^{-1}$ ), and [Zn] (65 to 500  $\mu\text{g g}^{-1}$ ) in ash collected from the 2012 Williams Fire in Los Angeles, California attest to the role of fires in remobilizing industrial metals deposited in forests. These remobilized trace metals may be dispersed by winds, increasing human exposures, and they may be deposited in water bodies, increasing exposures in aquatic ecosystems. Correlations between the concentrations of these trace metals, normalized to Fe, in ash from the fire suggest that Co, Cu, and Ni in most of those samples were predominantly from natural sources, whereas Pb and Zn were enriched in some ash samples. The predominantly anthropogenic source of excess Pb in the ash was further demonstrated by its isotopic ratios ( $^{208}\text{Pb}/^{207}\text{Pb}$ :  $^{206}\text{Pb}/^{207}\text{Pb}$ ) that fell between those of natural Pb and leaded gasoline sold in California during the previous century. These analyses substantiate current human and environmental health concerns with the pyrogenic remobilization of toxic metals, which are compounded by projections of increases in the intensity and frequency of wildfires associated with climate change.

**Citation:** Odigie KO, Flegal AR (2014) Trace Metal Inventories and Lead Isotopic Composition Chronicle a Forest Fire's Remobilization of Industrial Contaminants Deposited in the Angeles National Forest. PLoS ONE 9(9): e107835. doi:10.1371/journal.pone.0107835

**Editor:** Ben Bond-Lamberty, DOE Pacific Northwest National Laboratory, United States of America

**Received:** January 9, 2014; **Accepted:** August 4, 2014; **Published:** September 26, 2014

**Copyright:** © 2014 Odigie, Flegal. This is an open-access article distributed under the terms of the Creative Commons Attribution License, which permits unrestricted use, distribution, and reproduction in any medium, provided the original author and source are credited.

**Funding:** This work was supported by Flegal Research Fund and the Department of Energy (DOE) Office of Science Graduate Fellowship Program. All opinions expressed in this paper are the authors' and do not necessarily reflect the policies and views of DOE Office of Science. The funders had no role in study design, data collection and analysis, decision to publish, or preparation of the manuscript.

**Competing Interests:** The authors have declared that no competing interests exist.

\* Email: kodigie@ucsc.edu

## Introduction

### Historic Emissions of Trace Metals

Extensive anthropogenic emissions of environmentally persistent contaminants have substantially altered the natural biogeochemical cycles of some trace metals in the biosphere over the past century [1–3]. For example, ~90% and 75% of atmospheric lead (Pb) in California and the world, respectively, during the second half of the previous century were attributed to anthropogenic sources, predominantly the combustion of leaded gasoline [1].

These industrial emissions extensively contaminated aerosols and sediments in Southern California, where enormous amounts of leaded gasoline were combusted during the previous century. For example, ~8.9% (412,300 metric tons) of the estimated 4,639,000 metric tons of Pb additives used in gasoline in the US between 1950 and 1982 was in California [4]. Subsequently, Pb concentrations in surface soil in Los Angeles Metropolitan area increased from  $16 \pm 0.5 \mu\text{g/g}$  (mean  $\pm$  SD) between 1919 and 1933 to  $79 \pm 23 \mu\text{g/g}$  between 1967 and 1970 [5]; and the flux of Pb to sediments in the coastal San Pedro Basin, which abuts the Los Angeles Metropolitan area, increased by ~7-fold, compared to the natural rate, following the introduction of alkyl-lead gasoline additives in Southern California [6]. Similar temporal increases in fluxes of Pb in age-dated sediments that were attributed to the use of leaded gasoline have been documented in adjacent areas both north and south of Southern California, albeit at lower levels [7,8]. Substantial temporal increases in the fluxes of other trace metals,

e.g., zinc (Zn), associated with anthropogenic inputs have also been measured in Southern California [9].

However, efforts to reduce industrial metal contamination, especially Pb contamination, over the past half century have been quite successful in much of the world, notably the US and specifically Los Angeles. For example, the burden of emissions from the past combustion of leaded gasoline on humans is shown by the relatively high average blood Pb levels (PbB) of children (ages 1–5 years) in the US, which declined from 15  $\mu\text{g/dL}$  in 1976–1980 to 3.6  $\mu\text{g/dL}$  in 1988–1991, during the phase-out and subsequent elimination of leaded gasoline in the US, and then to the current level of 1.3  $\mu\text{g/dL}$  [10,11]. Despite these marked improvements, the current average PbB level in the US is still about 80-fold greater than the estimated natural PbB (0.016  $\mu\text{g/dL}$ ) level in humans [12] and health impairments are now being reported at Pb levels that were previously considered harmless [11,13]. Similarly, sublethal toxicities of other trace metals (e.g., Cu and Zn) continue to be documented at increasingly lower levels [14].

Moreover, the legacy of historic anthropogenic Pb emissions is evident in terrestrial and aquatic sediments in California and elsewhere [5,7]. Ten years after Pb was phased out from gasoline in California, concentrations of Pb ( $77 \pm 19 \mu\text{g/g}$ ) in soil in Pasadena, California were still 6-fold greater than the natural (baseline) Pb level ( $\sim 12.5 \mu\text{g/g}$ ) of crustal rock [5]. This persistence of industrial Pb deposits was summarized by Steding

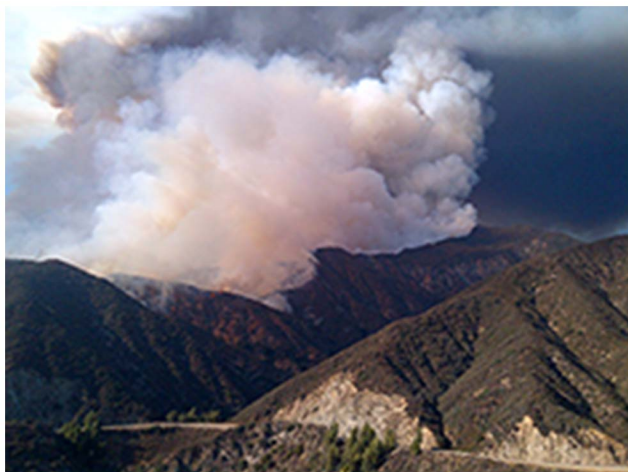

**Figure 1. Photograph of the 2012 Williams Fire in Angeles National Forest, California showing the relatively remote and mountainous terrain where the fire occurred.** Photo by Freddie W. Duncan, US Forest Service.  
doi:10.1371/journal.pone.0107835.g001

et al. [15] and Dunlap et al. [1], who predicted that it could take decades to centuries to flush leaded gasoline depositions from surface sediments in California’s Central Valley to San Francisco Bay. Similarly, Semlali et al. [16], based on a study in France, estimated that it would take at least 700 years to reduce the amount of anthropogenic Pb accumulated in soil by 50%.

**Remobilization of Trace Metals by Forest Fires**

Wildfires remobilize legacy trace metal contaminants deposited in grasslands and forests. Metals are sequestered in sediment, soil

organic matter, and vegetation in forests, where they are relatively immobile [17–19]. However, the combustion of vegetation and soil organic matter releases these trace metals in more labile forms [17,20]. In addition, forest fires increase erosion rates by as much as 100-fold and facilitate the rapid transport of remobilized trace metals to draining water bodies, raising contamination levels in aquatic ecosystems [21,22].

While there have been several investigations of the remobilization of mercury by forest fires [23,24], there have been few similar studies on the remobilization of Pb and other trace metals (e.g., Co and Zn). The latter include a recent study in the relatively unpopulated and relatively pristine Santa Barbara area north of Los Angeles [25] and a similar study in Australia [26]. In contrast to those studies, this study was conducted in the Angeles National Forest, which is adjacent to the Los Angeles Metropolitan area, which has a population of ~17 million [27], has many large sources of industrial contaminants [28–30], and ranks as one of the nation’s most contaminated metropolitan areas [31]. Moreover, “car is king” in Los Angeles, where leaded gasoline emissions were the dominant source of atmospheric Pb during the previous century and resuspension of that legacy pollution continues to be the principal component of atmospheric Pb today, as documented in mass balance study of atmospheric Pb contamination in the Los Angeles Air Basin [5]. Therefore, we hypothesized that forest fires within that basin would remobilize relatively large amounts of industrial Pb and other industrial metals, and that remobilization would add to the already large amounts of legacy gasoline Pb deposits that now constitute the major source of atmospheric Pb in Los Angeles.

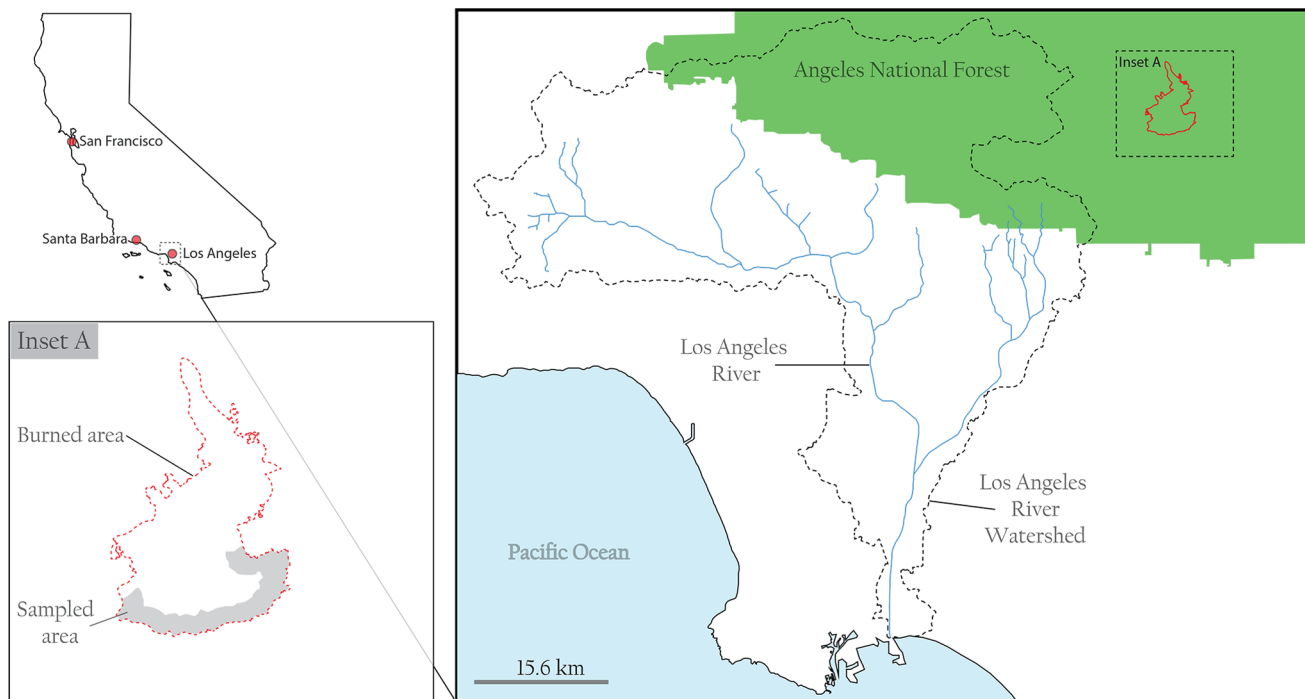

**Figure 2. Map showing approximate samples collection sites within the boundary of the 2012 Williams Fire in Angeles National Forest, California.**  
doi:10.1371/journal.pone.0107835.g002

**Table 1.** Detection limits of analytes.

| Detection Limit (3 x SD, Standard Deviation of 3 blanks) |       |       |       |       |       |       |
|----------------------------------------------------------|-------|-------|-------|-------|-------|-------|
| Element                                                  | [Co]  | [Cu]  | [Ni]  | [Pb]  | [Zn]  | [Fe]  |
| Detection Limit                                          | 0.002 | 0.010 | 0.002 | 0.008 | 0.148 | 0.035 |

doi:10.1371/journal.pone.0107835.t001

**Table 2.** Digestion recoveries (concentrations) for elements in standard reference materials (SRMs).

| SRM                              | % Recovery (Mean ± SD, n=3) |          |          |          |          |          |          |
|----------------------------------|-----------------------------|----------|----------|----------|----------|----------|----------|
|                                  | Co                          | Cu       | Ni       | Pb       | Zn       | Al       | Fe       |
| NIST SRM 1547 (Peach Leaves)     | 82.6±3.0                    | 89.3±0.7 | 74.5±2.8 | 104±0.8  | 98.7±1.2 | 65.7±5.2 | 86.7±4.7 |
| NIST SRM 2709 (San Joaquin Soil) | 52.0±0.4                    | 49.1±0.6 | 49.1±0.4 | 77.5±0.7 | 53.2±0.7 | 55.6±1.1 | 93.7±0.5 |
| NIST SRM 1633b (Coal Fly Ash)    | 43.7±0.7                    | 38.6±0.5 | 42.6±0.6 | 62.5±0.3 | 41.2±0.0 | 25.6±0.8 | 76.7±1.9 |

doi:10.1371/journal.pone.0107835.t002

**Table 3.** Analytical (instrumental) precision.

| SRM                    | % RSD (n = 5) |      |      |      |      | % RSD (n = 4) |      |  |  |  |
|------------------------|---------------|------|------|------|------|---------------|------|--|--|--|
|                        | [Co]          | [Cu] | [Ni] | [Pb] | [Zn] | [Al]          | [Fe] |  |  |  |
| SRM 1640a              | 0.9           | 1.1  | 0.9  | 0.5  | 1.6  | -             | -    |  |  |  |
| Consistency Standard A | 2.3           | 1.6  | 2.3  | 0.2  | 0.9  | 0.3           | 0.5  |  |  |  |
| Consistency Standard B | -             | -    | -    | -    | -    | 0.3           | 0.6  |  |  |  |

doi:10.1371/journal.pone.0107835.t003

## Materials and Methods

### Samples Collection Sites

The Angeles National Forest, which covers ~ 283,280 hectares (700,000 acres), abuts the Los Angeles Metropolitan Area [32]. The September 2012 Williams Fire scorched about 1,696 hectares (4,192 acres) of land in Angeles National Forest from approximately September 2<sup>nd</sup> to 13<sup>th</sup> (Fig. 1). The fire occurred in a very steep (~ 30–80% slope) area of the forest that is covered with medium to heavy brush. The fuels, mostly chaparral, brush, and mixed conifers, were approximately 15 to 20 years old [33]. Fourteen ash and 6 soil (from unburned patches) samples were collected from different accessible locations within the burned perimeter of the fire site (Figs. 1 and 2) using established trace metal clean techniques [25]. The samples were then transported in plastic containers to the University of California, Santa Cruz for processing. The collection location (GPS coordinates) for each sample is presented in Table S1 in File S1. No specific permissions were required to access and collect samples from the fire site, and the sampling did not involve interactions with endangered or protected species.

### Analytical Methods

Trace metal or ultra-pure (2x sub-boiling quartz distilled) grade reagents and high purity (18.2 MΩ cm) water (Milli-Q) were used for cleaning labware and processing samples. Fourteen ash and 6 soil samples, 3 procedural blanks, and triplicates of 3 National Institute of Standards and Technology (NIST) Standard Reference Materials (SRMs), SRM 1547 (peach leaves), SRM 2709 (San Joaquin soil), and SRM 1633b (coal fly ash), were processed concurrently in a Class-100 HEPA-filtered trace metal clean laboratory. Three ash samples (CWA-1, CWA-8, and CWA-14) and 2 soil samples (CWS-1 and CWS-6) were processed in triplicate.

A concentrated aqua regia (HNO<sub>3</sub>: HCl, 1:3 v/v) digestion was used to extract the acid-leachable (labile) trace (Co, Cu, Ni, Pb, and Zn) and major (Al and Fe) metals in the samples and reference materials [34,35] using established methods [8]. These metals were selected to represent a suite of inorganic contaminants emitted from anthropogenic sources at different – from relatively low (e.g., Ni) to high (e.g., Pb) – levels in Los Angeles [29,36,37]. Briefly, approximately 0.3 to 0.5 g of ash, soil or reference material was transferred to a clean Teflon digestion vial, dried overnight at 65°C, refluxed in hot (~130°C) aqua regia for about 6 hours, dried, weighed and redissolved in 10 mL of 1M ultrapure HNO<sub>3</sub>.

The digests were analyzed for trace metal (Co, Cu, Ni, Pb, and Zn) concentrations with a Finnigan ELEMENT 2 high resolution inductively coupled plasma – mass spectrometer (HR ICP-MS), and for Al and Fe concentrations with a PerkinElmer Optima 4300 DV inductively coupled plasma – optical emission spectrometer (ICP-OES). The concentrations of Fe were used to compute the enrichment factors of trace metals in the samples. The samples were then analyzed for stable lead isotopic composition after optimizing their concentrations with a Finnigan ELEMENT 2 HR ICP-MS. Internal standards were used to correct for instrumental drifts during analysis, and NIST SRM 981 (common lead) was used as standard to correct for instrumental fractionation of lead isotopic composition. The detection limit (3 x standard deviation of procedural blanks), reproducibility, and recoveries of each analyte are presented in Tables 1–4. The recoveries of metals in the NIST SRM 1547 (peach leaves) are assumed to be most representative of the metals

**Table 4.** Analytical (instrumental) precision for lead isotopic compositions.

| Sample | % RSD (n = 5)                     |                                   |                                   |
|--------|-----------------------------------|-----------------------------------|-----------------------------------|
|        | $^{208}\text{Pb}/^{207}\text{Pb}$ | $^{206}\text{Pb}/^{207}\text{Pb}$ | $^{207}\text{Pb}/^{204}\text{Pb}$ |
| CWA-2  | 0.07                              | 0.04                              | 0.09                              |

doi:10.1371/journal.pone.0107835.t004

in the ash samples since they were derived predominantly from vegetation and soil organic matter.

## Results and Discussion

### Metal Concentrations

The “acid-leachable” concentrations of Al, Co, Cu, Fe, Ni, Pb, and Zn, and lead isotopic ratios ( $^{208}\text{Pb}/^{207}\text{Pb}$ ,  $^{206}\text{Pb}/^{207}\text{Pb}$ , and  $^{207}\text{Pb}/^{204}\text{Pb}$ ) of the ash and soil samples are listed in Table 5. The enrichment factors of the trace metals (Co, Cu, Ni, Pb, and Zn) normalized to Fe are listed in Table S2 in File S1. These concentrations and enrichment factors are considered conservative because they may not include metals volatilized during the fire and those contained in refractory aluminosilicate lattices, which require dissolution with concentrated HF [38,39].

Concentrations of Co (3.1 to 11  $\mu\text{g g}^{-1}$ ), Cu (15 to 69  $\mu\text{g g}^{-1}$ ), Ni (5.9 to 15  $\mu\text{g g}^{-1}$ ), Pb (7.4 to 42  $\mu\text{g g}^{-1}$ ), and Zn (65 to 500  $\mu\text{g g}^{-1}$ ) in the ash varied substantially. The ranges of these concentrations are consistent with those measured in ash collected from the 2009 Jesusita Forest Fire site in Santa Barbara, California (Table 5). The concentrations are also comparable to concentrations of these metals in ash sourced primarily from the experimental combustion of ponderosa pines in Montana [40]. The relatively high Zn levels potentially originated from anthropogenic sources, which have typically included fossil fuel combustion exhaust, galvanized parts and railings, break lining wear, and tire wear [41,42].

Variations in the amounts of these remobilized metals presumably reflect variations in baseline concentrations of the metals, anthropogenic input, and levels of volatilization of organic matter during the fire [43,44]. The concentrations of Co (6.3 to 13  $\mu\text{g g}^{-1}$ ), Cu (17 to 32  $\mu\text{g g}^{-1}$ ), Ni (6.0 to 21  $\mu\text{g g}^{-1}$ ), Pb (8.6 to 140  $\mu\text{g g}^{-1}$ ), and Zn (32 to 61  $\mu\text{g g}^{-1}$ ) in the soil samples are also comparable to previously reported values of soils in Southern California [45–47]. The concentrations of some metals (e.g., Co and Ni) in the soils approximate their baseline concentrations in Southern California, but the >2-fold increase in Pb concentrations (e.g., 140  $\mu\text{g g}^{-1}$ ) indicated that the Angeles National Forest site had received substantial Pb inputs from anthropogenic sources.

### Enrichment Factors

The amounts of anthropogenic trace metals in the ash are indicated by the enrichment factors of the metals normalized to Fe: Co (0.9 to 2.5), Cu (0.9 to 6.2), Ni (0.3 to 1.0), Pb (1.9 to 29), and Zn (0.9 to 19) (Table S2 in File S1).

$$EF = \frac{\frac{[X]_{\text{Sample}}}{[Fe]_{\text{Sample}}}}{\frac{[X]_{\text{Baseline}}}{[Fe]_{\text{Baseline}}}}$$

We calculated the enrichment factor of each metal by normalizing the concentrations of the metal ( $[X]_{\text{Sample}}$ ) and iron ( $[Fe]_{\text{Sample}}$ ) in the sample to the baseline concentrations of each metal ( $[X]_{\text{Baseline}}$ ) and iron ( $[Fe]_{\text{Baseline}}$ ) of  $^{210}\text{Pb}$ -dated preindustrial sediment deposited in San Pedro Basin, which drains parts of the Los Angeles Metropolitan Area. Normalization of trace metals to Fe is considered more appropriate than normal-

ization to Al for samples that were not treated with HF because of the recalcitrance of aluminosilicates as indicated by the difference in the recoveries of these metals in the NIST SRMs (Table 2). Using the enrichment classification proposed by Sutherland [48], the ratios indicate that: Co was not measurably enriched ( $EF < 2$ ) in 10 samples and moderately enriched ( $EF = 2-5$ ) in 4 samples; Cu was not measurably enriched in 5 samples, moderately enriched in 7 samples, and significantly enriched ( $EF = 5-20$ ) in 2 samples; Ni was not measurably enriched in all 14 ash samples; Pb was not measurably enriched in 1 sample, moderately enriched in 7 samples, significantly enriched in 5 samples, and very highly enriched ( $EF = 20-40$ ) in 1 sample; and Zn was not measurably enriched in 4 samples, moderately enriched in 5 samples, and significantly enriched in 5 samples. These industrial enrichments were further indicated by the simple linear correlations between the concentrations of the metals and the concentrations of Fe: [Co] ( $r = 0.576$ ,  $p = 0.031$ ,  $n = 14$ ), [Cu] ( $r = 0.058$ ,  $p = 0.844$ ,  $n = 14$ ), [Ni] ( $r = 0.612$ ,  $p = 0.020$ ,  $n = 14$ ), [Pb] ( $r = -0.158$ ,  $p = 0.590$ ,  $n = 14$ ), and [Zn] ( $r = -0.221$ ,  $p = 0.448$ ,  $n = 14$ ) in the ash. Metals that are primarily from natural origin, e.g., [Al] and [Fe] ( $r = 0.909$ ,  $p = 0.000007$ ,  $n = 14$ ), which are relatively abundant and not easy to contaminate, correlate better than those enriched by anthropogenic inputs [49]. The addition of anthropogenic metal, e.g., Pb, to a system often changes its relative abundance to normalizing major elements as indicated by the correlation of [Pb] and [Fe] above. These varying enrichments are also generally consistent with those of these metals in ash collected from the 2009 Jesusita Fire in Santa Barbara, California [e.g., 25].

### Lead Isotopic Compositions

The apparent anthropogenic enrichment of Pb in some of the samples is further demonstrated in Figure 3, which is a plot of the lead isotopic ratios ( $^{208}\text{Pb}/^{207}\text{Pb}$ :  $^{206}\text{Pb}/^{207}\text{Pb}$ ) of the ash and soil samples. The plot also includes the lead isotopic compositions of pre-industrial and contaminated sediment deposited in the San Pedro Basin, which drains parts of the Los Angeles Metropolitan area as previously mentioned, and those of leaded gasoline sold in California during the second half of the last century.

The plot indicates that the Pb in the ash is mainly from anthropogenic sources, predominantly the past combustion of leaded gasoline. The plot also indicates that the portion of anthropogenic Pb from the leaded gasoline used between 1964 to 1979 was substantially larger than that from the 1980s leaded gasoline in the ash, which contrasts the results from the Santa Barbara study that indicate that the predominant source of anthropogenic Pb was the combustion of the 1980s leaded gasoline [25]. The predominantly alkyl-lead in the samples is further corroborated by the isotopic compositions of Pb in most (4) of the soil samples (Fig. 3). Two soil samples (CWS-4 and CWS-5) have distinct Pb isotopic compositions compared to the other samples and are assumed to be representative of mixtures between baseline and anthropogenic Pb or variants of baseline Pb isotopic compositions.



**Table 5.** Concentrations ( $\mu\text{g g}^{-1}$ ) of trace metals: Co, Cu, Ni, Pb, and Zn; concentrations ( $\text{mg g}^{-1}$ ) of Al and Fe; and lead isotopic composition of ash (CWA) and soil (CWS) samples collected from the 2012 Williams Fire in Angeles National Forest in Southern California.

| Sample ID                                                                 | Concentrations [mean $\pm$ (standard deviation, SD)] |                               |                               |                               |                               | Lead Isotopic Ratios [mean $\pm$ (SD)] |                             |                                   |                                   |                                   |
|---------------------------------------------------------------------------|------------------------------------------------------|-------------------------------|-------------------------------|-------------------------------|-------------------------------|----------------------------------------|-----------------------------|-----------------------------------|-----------------------------------|-----------------------------------|
|                                                                           | [Co] ( $\mu\text{g g}^{-1}$ )                        | [Cu] ( $\mu\text{g g}^{-1}$ ) | [Ni] ( $\mu\text{g g}^{-1}$ ) | [Pb] ( $\mu\text{g g}^{-1}$ ) | [Zn] ( $\mu\text{g g}^{-1}$ ) | [Al] ( $\text{mg g}^{-1}$ )            | [Fe] ( $\text{mg g}^{-1}$ ) | $^{208}\text{Pb}/^{207}\text{Pb}$ | $^{206}\text{Pb}/^{207}\text{Pb}$ | $^{207}\text{Pb}/^{204}\text{Pb}$ |
| CWA-1*                                                                    | 3.90<br>(0.05)                                       | 15.4<br>(0.24)                | 6.77<br>(0.25)                | 16.0<br>(0.04)                | 216<br>(2.92)                 | 13.8<br>(0.55)                         | 10.9<br>(0.29)              | 2.454<br>(0.001)                  | 1.189<br>(0.001)                  | 15.673<br>(0.004)                 |
| CWA-2                                                                     | 7.54                                                 | 68.5                          | 10.6                          | 24.0                          | 128                           | 18.4                                   | 25.0                        | 2.461                             | 1.185                             | 15.635                            |
| CWA-3                                                                     | 3.59                                                 | 41.3                          | 9.21                          | 42.2                          | 83.0                          | 5.79                                   | 6.94                        | 2.438                             | 1.178                             | 15.656                            |
| CWA-4                                                                     | 6.76                                                 | 30.8                          | 10.6                          | 14.8                          | 85.0                          | 18.7                                   | 24.4                        | 2.457                             | 1.190                             | 15.633                            |
| CWA-5                                                                     | 3.81                                                 | 38.6                          | 9.72                          | 20.8                          | 65.3                          | 7.86                                   | 10.8                        | 2.454                             | 1.192                             | 15.659                            |
| CWA-6                                                                     | 8.75                                                 | 56.0                          | 12.5                          | 27.2                          | 414                           | 13.6                                   | 16.2                        | 2.463                             | 1.213                             | 15.684                            |
| CWA-7                                                                     | 5.17                                                 | 65.5                          | 14.3                          | 38.5                          | 203                           | 14.3                                   | 13.8                        | 2.451                             | 1.195                             | 15.711                            |
| CWA-8*                                                                    | 10.9<br>(0.74)                                       | 58.2<br>(3.24)                | 13.3<br>(0.52)                | 8.95<br>(1.02)                | 374<br>(15.7)                 | 13.0<br>(0.36)                         | 17.0<br>(0.55)              | 2.457<br>(0.001)                  | 1.193<br>(0.002)                  | 15.660<br>(0.011)                 |
| CWA-9                                                                     | 4.32                                                 | 17.3                          | 10.5                          | 9.68                          | 96.5                          | 14.3                                   | 16.2                        | 2.471                             | 1.186                             | 15.662                            |
| CWA-10                                                                    | 7.47                                                 | 26.3                          | 14.6                          | 20.0                          | 73.6                          | 24.4                                   | 31.5                        | 2.458                             | 1.187                             | 15.672                            |
| CWA-11                                                                    | 3.13                                                 | 17.0                          | 5.86                          | 8.23                          | 74.2                          | 7.42                                   | 8.71                        | 2.450                             | 1.189                             | 15.733                            |
| CWA-12                                                                    | 6.05                                                 | 20.5                          | 11.2                          | 17.3                          | 65.5                          | 18.6                                   | 18.1                        | 2.462                             | 1.183                             | 15.669                            |
| CWA-13                                                                    | 6.30                                                 | 56.8                          | 9.17                          | 11.5                          | 503                           | 7.85                                   | 10.7                        | 2.472                             | 1.188                             | 15.664                            |
| CWA-14*                                                                   | 6.66<br>(0.27)                                       | 43.3<br>(0.23)                | 12.9<br>(0.15)                | 7.38<br>(0.25)                | 66.6<br>(0.68)                | 20.7<br>(0.53)                         | 19.2<br>(0.39)              | 2.450<br>(0.001)                  | 1.189<br>(0.001)                  | 15.686<br>(0.017)                 |
| CWS-1*                                                                    | 7.31<br>(0.10)                                       | 20.0<br>(3.89)                | 6.04<br>(0.14)                | 20.7<br>(0.76)                | 44.5<br>(0.46)                | 29.2<br>(2.11)                         | 52.4<br>(1.84)              | 2.459<br>(0.002)                  | 1.181<br>(0.000)                  | 15.635<br>(0.011)                 |
| CWS-2                                                                     | 8.65                                                 | 19.6                          | 21.1                          | 143                           | 61.2                          | 35.1                                   | 46.8                        | 2.461                             | 1.204                             | 15.647                            |
| CWS-3                                                                     | 12.5                                                 | 32.1                          | 16.8                          | 20.3                          | 41.5                          | 32.1                                   | 43.5                        | 2.455                             | 1.178                             | 15.614                            |
| CWS-4                                                                     | 6.26                                                 | 25.9                          | 11.8                          | 8.62                          | 32.0                          | 20.7                                   | 28.1                        | 2.506                             | 1.196                             | 15.684                            |
| CWS-5                                                                     | 8.82                                                 | 17.0                          | 15.0                          | 10.9                          | 37.3                          | 34.9                                   | 40.1                        | 2.491                             | 1.185                             | 15.643                            |
| CWS-6*                                                                    | 9.98<br>(0.67)                                       | 20.0<br>(0.89)                | 13.1<br>(1.21)                | 16.4<br>(1.81)                | 44.2<br>(0.65)                | 33.5<br>(5.00)                         | 46.4<br>(1.37)              | 2.443<br>(0.001)                  | 1.160<br>(0.006)                  | 15.581<br>(0.024)                 |
| <b>Jesuita Fire ash, Santa Barbara, California (Data Summary, n = 30)</b> |                                                      |                               |                               |                               |                               |                                        |                             |                                   |                                   |                                   |
| Mean, $\bar{x}$                                                           | 4.46                                                 | -                             | 22.7                          | 18.8 <sup>†</sup>             | 151                           | 16.7 <sup>†</sup>                      | 13.9 <sup>†</sup>           | 2.466 <sup>†</sup>                | 1.205 <sup>†</sup>                | 15.635 <sup>†</sup>               |
| Range (Min to Max)                                                        | 1.95                                                 | -                             | 8.88                          | 4.29 <sup>†</sup>             | 41.6                          | 5.70 <sup>†</sup>                      | 5.00 <sup>†</sup>           | 2.436 <sup>†</sup>                | 1.161 <sup>†</sup>                | 15.563 <sup>†</sup>               |
|                                                                           | -                                                    | -                             | -                             | -                             | -                             | -                                      | -                           | -                                 | -                                 | -                                 |
|                                                                           | 7.23                                                 | -                             | 49.1                          | 51.0 <sup>†</sup>             | 433                           | 36.0 <sup>†</sup>                      | 31.1 <sup>†</sup>           | 2.481 <sup>†</sup>                | 1.218 <sup>†</sup>                | 15.716 <sup>†</sup>               |

Samples marked with (\*) were processed in triplicates and are reported as mean  $\pm$  (standard deviation, SD). Also listed in the table are the ranges and mean concentrations of metals and lead isotopic compositions of ash collected from the 2009 Jesuita Fire in Santa Barbara, California. Data marked with (†) were summarized from Odigie and Flegal [25].  
doi:10.1371/journal.pone.0107835.t005

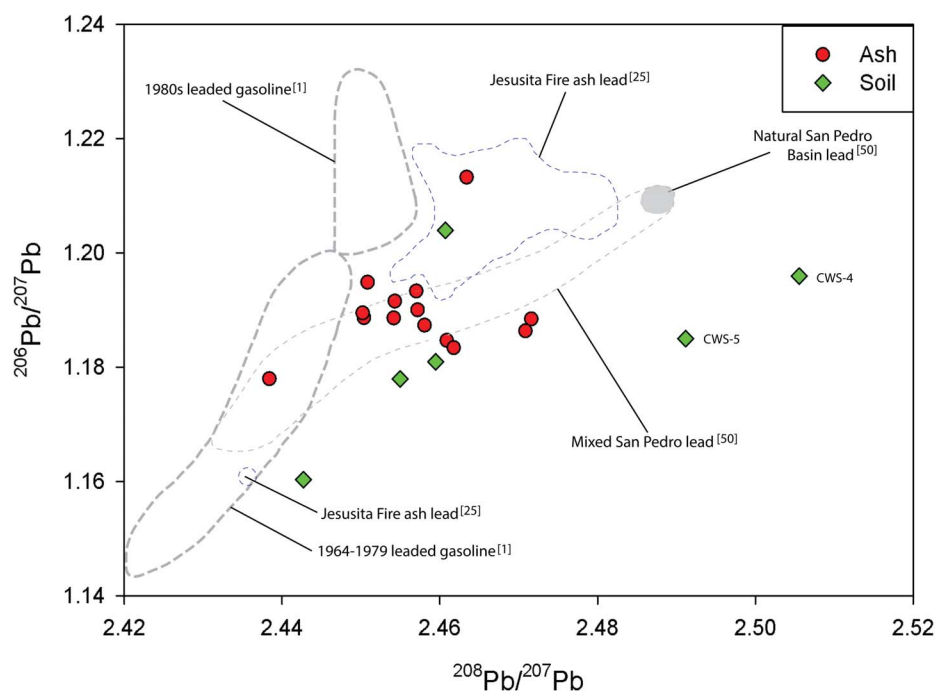

**Figure 3. Lead isotopic composition ( $^{208}\text{Pb}/^{207}\text{Pb}$ :  $^{206}\text{Pb}/^{207}\text{Pb}$ ) of ash and soil samples collected from the 2012 Williams Fire site in Southern California.** The plot also includes the ranges of isotopic composition of alkyl-lead used in California and those of  $^{210}\text{Pb}$  dated sediment cores in the San Pedro Basin. Also included in the plot are the ranges of Pb isotopic composition of ash collected from the 2009 Jesusita Fire in Santa Barbara, California.

doi:10.1371/journal.pone.0107835.g003

The apparent leaded gasoline signature of Pb in the samples attests to the persistence of industrial Pb deposits in the Los Angeles Basin that is consistent with the results of the mass balance study by Harris and Davidson [5]. It is also consistent with previous reports on the persistence of industrial Pb deposits in California's Central Valley, which is north of Los Angeles, based on both mass balance and lead isotopic composition analyses [1,15]. The latter has been principally traced to atmospheric depositions from the combustion of leaded gasoline in California [1].

This attribution is based on the temporal changes in the isotopic compositions of leaded gasoline in California in the previous century. Before 1960, alkyl-lead in the US was primarily manufactured with ores from Australia, Canada, Mexico, and Peru, which had  $^{206}\text{Pb}/^{207}\text{Pb}$  ratios of 1.037, 1.064, 1.192, and 1.200, respectively. Then, the proportion of Pb sourced from the Missouri deposits ( $^{206}\text{Pb}/^{207}\text{Pb} = 1.28$  to 1.33) increased from 9% in 1962 to 82% in 1976 [50]. This change in the sources of Pb in alkyl-lead was subsequently reflected in the Pb isotopic compositions of aerosols in Southern California. There, the  $^{206}\text{Pb}/^{207}\text{Pb}$  ratio of aerosols, which was  $\sim 1.15$  before 1967, increased to 1.20 by 1974, and then to 1.23 by 1977 [51].

### Accelerated Transport of Contaminants to Water Bodies and Atmosphere

In addition to atmospheric contamination, wildfires increase the load of contaminants in aquatic ecosystems. This was recently documented in a study [22] that examined the impact of wildfires on contaminant loadings in Southern California – the same area where the Williams Fire occurred. The results from that study show that the mean fluxes of Cu, Pb, Ni, and Zn from burned sites were 110-fold, 740-fold, 82-fold, and 110-fold greater compared to

their respective fluxes at similar unburned (control) sites. That study also found that the mean post-fire concentrations of Cu, Pb, Ni, and Zn in the first stormwater collected from an area that was  $\sim 20$  km from the closest fire site were each 3 times their pre-fire levels, which they attributed to ash fallout. Similarly, Sabin et al. [52] reported 4-fold, 6-fold, 8-fold, and 13-fold post-fire increases in fluxes of Cu, Zn, Pb, and Ni, respectively, over their mean fluxes in an unburned site in Southern California, which were likewise attributed to forest fires in nearby mountains. Those attributions are consistent with results from a study by Young and Jan [53], who showed that trace metals (Cu, Ni, Pb, and Zn) fallout increased by up to 3-fold in a 10,000 km<sup>2</sup> unburned area that was impacted by smoke plumes and ash from wildfires in the Angeles National Forest in Southern California.

### Potential Impact of Climate Change

The mobilization of contaminants by wildfires is a concern, especially in the western US where climate change is expected to dramatically expand fire regimes [54]. Recent studies have linked increases in fire intensity, frequency, and burned area to climate change [55–57]. For example, wildfire frequency has been positively linked ( $r = 0.76$ ,  $p < 0.001$ ,  $n = 34$ ) to regional spring and summer temperatures in western US [54]. The frequency of wildfires and total area burned in western US in the mid-1980s were  $\sim 4$  times and  $\sim 7$  times, respectively, higher than their mean values from 1970 to 1986, and this interval was marked by a rise in temperature of  $< 0.9^\circ\text{C}$  [54]. Furthermore, the Intergovernmental Panel on Climate Change has projected that global mean surface temperature could increase by up to  $4.8^\circ\text{C}$  by the end of this century (2081–2100) relative to 1986–2005, and researchers have predicted a corresponding increase in the frequency and intensity of wildfires [58–61]. Consequently, it is hypothesized that the pyrogenic remobilization and volatilization of contaminants from

forests and grasslands will increase in response to projected climate change. That expected increase is a concern, especially in forests contaminated with radioactive pollutants and at sites used for nuclear waste storage, as recently highlighted for Chernobyl, Ukraine and Los Alamos National Laboratory, US, respectively [62–64]. The results from this and complementary studies provide empirical evidence that wildfires are already remobilizing and volatilizing other contaminants – albeit more pedestrian ones – that constitute a greater global health problem (e.g., Pb).

## Supporting Information

**File S1 Tables S1–S2.** Table S1: Collection locations (coordinates) for ash (CWA) and soil (CWS) samples collected from the 2012 Williams Fire site in the Angeles National Forest in California. Table S2: Enrichment factors ( $f$ -Fe, normalized to

Fe) of trace metals in ash (CWA) samples collected from the 2012 Williams Fire site in the Angeles National Forest in California. (DOCX)

## Acknowledgments

Special thanks to Aradhna Tripathi and John Mering of UCLA, Martha Thomas, and Priya Ganguli for help with sample collection; Rob Franks of UCSC for analytical support; and all members of the WIGS laboratory, especially Sharon Hibdon, for their support with this project.

## Author Contributions

Conceived and designed the experiments: KO ARF. Performed the experiments: KO. Analyzed the data: KO. Contributed reagents/materials/analysis tools: KO ARF. Wrote the paper: KO ARF.

## References

- Dunlap CE, Alpers CN, Bouse R, Taylor HE, Unruh DM, et al. (2008) The persistence of lead from past gasoline emissions and mining drainage in a large riparian system: Evidence from lead isotopes in the Sacramento River, California. *Geochim Cosmochim Acta* 72: 5935–5948.
- Nriagu JO (1996) A history of global metal pollution. *Science* 272: 223–224.
- Flegal AR, Gallon C, Ganguli PM, Conaway CH (2013) All the Lead in China. *Crit Rev Environ Sci Technol* 43: 1869–1944.
- Mielke HW, Laidlaw MAS, Gonzales C (2010) Lead (Pb) legacy from vehicle traffic in eight California urbanized areas: Continuing influence of lead dust on children's health. *Sci Total Environ* 408: 3965–3975.
- Harris AR, Davidson CI (2005) The role of resuspended soil in lead flows in the California South Coast Air Basin. *Environ Sci Technol* 39: 7410–7415.
- Chow TJ, Bruland KW, Bertine K, Soutar A, Koide M, et al. (1973) Lead pollution: Records in Southern California coastal sediments. *Science* 181: 551–552.
- Ritson PI, Bouse RM, Flegal AR, Luoma SN (1999) Stable lead isotopic analyses of historic and contemporary lead contamination of San Francisco Bay estuary. *Mar Chem* 64: 71–83.
- Soto-Jimenez MF, Hibdon SA, Rankin CW, Aggarawal J, Ruiz-Fernandez AC, et al. (2006) Chronically a century of lead pollution in Mexico: Stable lead isotopic composition analyses of dated sediment cores. *Environ Sci Technol* 40: 764–770.
- Finney B, Huh C-A (1989) High resolution sedimentary records of heavy metals from the Santa Monica and San Pedro Basins, California. *Mar Pollut Bull* 20: 181–187.
- Pirkle JL, Brody DJ, Gunter EW, Kramer RA, Paschal DC, et al. (1994) The decline in blood lead levels in the United States-The National Health and Nutrition Examination Surveys (NHANES). *Jama-J Am Med Assoc* 272: 284–291.
- Wheeler W, Brown MJ (2013) Blood lead levels in children aged 1–5 years – United States, 1999–2010. *CDC MMWR* 62: 245–248.
- Flegal AR, Smith DR (1992) Lead levels in preindustrial humans. *N Engl J Med* 326: 1293–1294.
- WHO (2010) Childhood lead poisoning. Geneva, Switzerland, 74: WHO Document Production Services. 74 p.
- McGeer JC, Szebedinsky C, McDonald DG, Wood CM (2000) Effects of chronic sublethal exposure to waterborne Cu, Cd or Zn in rainbow trout. 1: Iono-regulatory disturbance and metabolic costs. *Aquat Toxicol* 50: 231–243.
- Steding DJ, Dunlap CE, Flegal AR (2000) New isotopic evidence for chronic lead contamination in the San Francisco Bay estuary system: Implications for the persistence of past industrial lead emissions in the biosphere. *Proc Natl Acad Sci USA* 97: 11181–11186.
- Semlali RM, Dessogne JB, Monna F, Bolte J, Azimi S, et al. (2004) Modeling lead input and output in soils using lead isotopic geochemistry. *Environ Sci Technol* 38: 1513–1521.
- Biswas A, Blum JD, Klaue B, Keeler GJ (2007) Release of mercury from Rocky Mountain forest fires. *Global Biogeochem Cycles* 21: DOI: 10.1029/2006GB002696.
- Obrist D, Moosmuller H, Schurmann R, Chen LWA, Kreidenweis SM (2008) Particulate-phase and gaseous elemental mercury emissions during biomass combustion: Controlling factors and correlation with particulate matter emissions. *Environ Sci Technol* 42: 721–727.
- Friedli HR, Arellano AF, Cinnirella S, Pirrone N (2009) Initial estimates of mercury emissions to the atmosphere from global biomass burning. *Environ Sci Technol* 43: 3507–3513.
- Wiedinmyer C, Friedli H (2007) Mercury emission estimates from fires: An initial inventory for the United States. *Environ Sci Technol* 41: 8092–8098.
- Cohen AS, Palacios-Fest MR, McGill J, Swarzenski PW, Verschuren D, et al. (2005) Paleolimnological investigations of anthropogenic environmental change in Lake Tanganyika: I. An introduction to the project. *J Paleolimnol* 34: 1–18.
- Stein ED, Brown JS, Hogue TS, Burke MP, Kinoshita A (2012) Stormwater contaminant loading following southern California wildfires. *Environ Toxicol Chem* 31: 2625–2638.
- Witt EL, Kolka RK, Nater EA, Wickman TR (2009) Forest fire effects on mercury deposition in the boreal forest. *Environ Sci Technol* 43: 1776–1782.
- Biswas A, Blum JD, Keeler GJ (2008) Mercury storage in surface soils in a central Washington forest and estimated release during the 2001 Rex Creek Fire. *Sci Tot Environ* 404: 129–138.
- Odigie KO, Flegal AR (2011) Pyrogenic remobilization of historic industrial lead depositions. *Environ Sci Technol* 45: 6290–6295.
- Kristensen LJ, Taylor MP, Odigie KO, Hibdon SA, Flegal AR (2014) Lead isotopic compositions of ash sourced from Australian bushfires. *Environ Pollut* 190: 159–165.
- US Census (2013) US Census Bureau 2012 population estimate. Available: <http://quickfacts.census.gov/qfd/states/06/06037.html>. Accessed 2013 May 22.
- Smail EA, Webb EA, Franks RP, Bruland KW, Sanudo-Wilhelmy SA (2012) Status of metal contamination in surface waters of the coastal ocean off Los Angeles, California since the implementation of the Clean Water Act. *Environ Sci Technol* 46: 4304–4311.
- Singh M, Jaques PA, Sioutas C (2002) Size distribution and diurnal characteristics of particle-bound metals in source and receptor sites of the Los Angeles Basin. *Atmos Environ* 36: 1675–1689.
- Sardar SB, Fine PM, Sioutas C (2005) Seasonal and spatial variability of the size-resolved chemical composition of particulate matter (PM<sub>10</sub>) in the Los Angeles Basin. *J Geophys Res-Atmos* 110: D07S08.
- Su JG, Jerrett M, Beckerman B, Wilhelm M, Ghosh JK, et al. (2009) Predicting traffic-related air pollution in Los Angeles using a distance decay regression selection strategy. *Environ Res* 109: 657–670.
- USDA (2013) Angeles National Forest. Available: <http://www.fs.usda.gov/main/angeles/about-forest>. Accessed 2013 Feb 19.
- InciWeb (2012) Camp Williams Fire. Available: <http://www.inciweb.org/incident/3230/>. Accessed 2013 Feb 19.
- Kober B, Wessels M, Bollhofer A, Mangini A (1999) Pb isotopes in sediments of Lake Constance, Central Europe constrain the heavy metal pathways and the pollution history of the catchment, the lake and the regional atmosphere. *Geochim Cosmochim Acta* 63: 1293–1303.
- Emmanuel S, Erel Y (2002) Implications from concentrations and isotopic data for Pb partitioning processes in soils. *Geochim Cosmochim Acta* 66: 2517–2527.
- Bruland KW, Bertine K, Koide M, Goldberg ED (1974) History of metal pollution in Southern California Coastal Zone. *Environ Sci Technol* 8: 425–432.
- Hu S, Hermer JD, Shafer M, Robertson W, Schauer JJ, et al. (2009) Metals emitted from heavy-duty diesel vehicles equipped with advanced PM and NO<sub>x</sub> emission controls. *Atmos Environ* 43: 2950–2959.
- Hornberger MI, Luoma SN, van Geen A, Fuller C, Anima R (1999) Historical trends of metals in the sediments of San Francisco Bay, California. *Mar Chem* 64: 39–55.
- Schiff KC, Weisberg SB (1999) Iron as a reference element for determining trace metal enrichment in Southern California coastal shelf sediments. *Mar Environ Res* 48: 161–176.
- Gabet EJ, Bookter A (2011) Physical, chemical and hydrological properties of Ponderosa pine ash. *Int J Wildland Fire* 20: 443–452.
- Councell TB, Duckenfield KU, Landa ER, Callender E (2004) Tire-wear particles as a source of zinc to the environment. *Environ Sci Technol* 38: 4206–4214.
- Pakbin P, Ning Z, Shafer MM, Schauer JJ, Sioutas C (2011) Seasonal and Spatial Coarse Particle Elemental Concentrations in the Los Angeles Area. *Aerosol Sci Technol* 45: 949–U156.



43. Ranali AJ (2004) A summary of the scientific literature on the effects of fire on the concentration of nutrients in surface waters. USGS Open-File Report 2004–1296.
44. Simpson IJ, Akagi SK, Barletta B, Blake NJ, Choi Y, et al. (2011) Boreal forest fire emissions in fresh Canadian smoke plumes: C-1-C-10 volatile organic compounds (VOCs), CO<sub>2</sub>, CO, NO<sub>2</sub>, NO, HCN and CH<sub>3</sub>CN. *Atmos Chem Phys* 11: 6445–6463.
45. Wu J, Edwards R, He XQ, Liu Z, Kleinman M (2010) Spatial analysis of bioavailable soil lead concentrations in Los Angeles, California. *Environ Res* 110: 309–317.
46. Holmgren GGS, Meyer MW, Chaney RL, Daniels RB (1993) Cadmium, lead, zinc, copper, and nickel in agricultural soils of the United States of America. *J Environ Qual* 22: 335–348.
47. Shacklette HT, Boermgen JG (1984) Element concentrations in soils and other surficial materials of the conterminous United States. U.S. Geological Survey Professional Paper 1270.
48. Sutherland RA (2000) Bed sediment-associated trace metals in an urban stream, Oahu, Hawaii. *Environ Geol* 39: 611–627.
49. Daskalakis KD, O'Connor TP (1995) Normalization and elemental sediment contamination in the Coastal United States. *Environ Sci Technol* 29: 470–477.
50. Ng A, Patterson CC (1982) Changes of lead and barium with time in California off-shore basin sediments. *Geochim Cosmochim Acta* 46: 2307–2321.
51. Shirahata H, Elias RW, Patterson CC, Koide M (1980) Chronological variations in concentrations and isotopic compositions of anthropogenic atmospheric lead in sediments of a remote subalpine pond. *Geochim Cosmochim Acta* 44: 149–162.
52. Sabin LD, Lim JH, Stolzenbach KD, Schiff KC (2005) Contribution of trace metals from atmospheric deposition to stormwater runoff in a small impervious urban catchment. *Water Res* 39: 3929–3937.
53. Young DR, Jan TK (1977) Fire fallout of metals off California. *Mar Pollut Bull* 8: 109–112.
54. Westerling AL, Hidalgo HG, Cayan DR, Swetnam TW (2006) Warming and earlier spring increase western US forest wildfire activity. *Science* 313: 940–943.
55. Gillett NP, Weaver AJ, Zwiers FW, Flannigan MD (2004) Detecting the effect of climate change on Canadian forest fires. *Geophys Res Lett* 31: DOI: 10.1029/2004GL020876.
56. Westerling AL, Turner MG, Smithwick EAH, Romme WH, Ryan MG (2011) Continued warming could transform Greater Yellowstone fire regimes by mid-21st century. *Proc Natl Acad Sci USA* 108: 13165–13170.
57. Wang YH, Flannigan M, Anderson K (2010) Correlations between forest fires in British Columbia, Canada, and sea surface temperature of the Pacific Ocean. *Ecol Model* 221: 122–129.
58. IPCC (2013) *Climate Change 2013: The Physical Science Basis*: Cambridge Univ. Press, New York.
59. McKenzie D, Gedalof Z, Peterson DL, Mote P (2004) Climatic change, wildfire, and conservation. *Conserv Biol* 18: 890–902.
60. Schuur EAG, Bockheim J, Canadell JG, Euskirchen E, Field CB, et al. (2008) Vulnerability of permafrost carbon to climate change: Implications for the global carbon cycle. *Bioscience* 58: 701–714.
61. Flannigan MD, Logan KA, Amiro BD, Skinner WR, Stocks BJ (2005) Future area burned in Canada. *Clim Change* 72: 1–16.
62. Charles D (2010) Russia's forest fires ignite concerns about Chernobyl's legacy. *Science* 329: 738–739.
63. Gilbert N (2010) Russia counts environmental cost of wildfires. *Nature* DOI: 10.1038/news.2010.404.
64. Weinhold B (2011) Fields and forests in flames: Vegetation, smoke & human health. *Environ Health Perspect* 119: A386–A393.
